# Supplementary figures and images for: Drosophila gustatory projections are segregated by taste modality and connectivity
Source: eLife journal article supplement (doi:10.7554/elife.78110), 2022-05-25

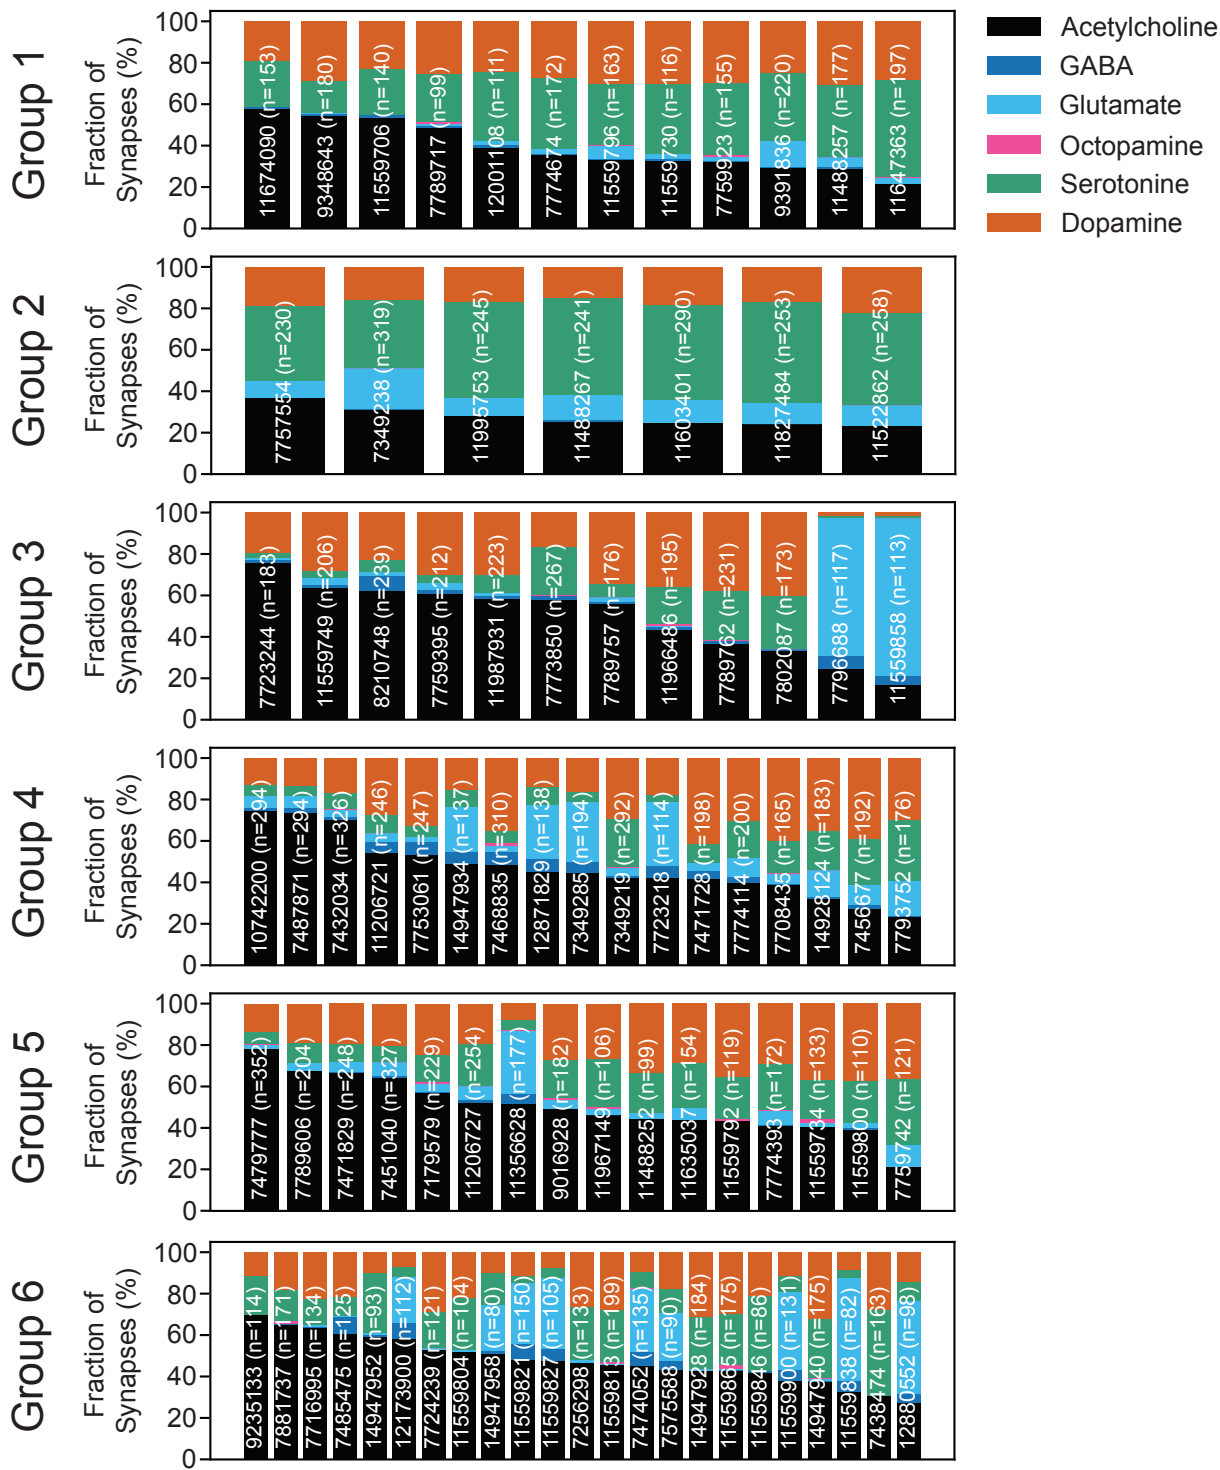

Supplement: supp [file elife-78110-supp-v1.zip]

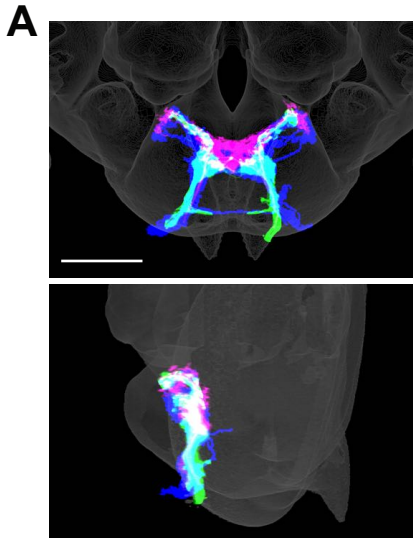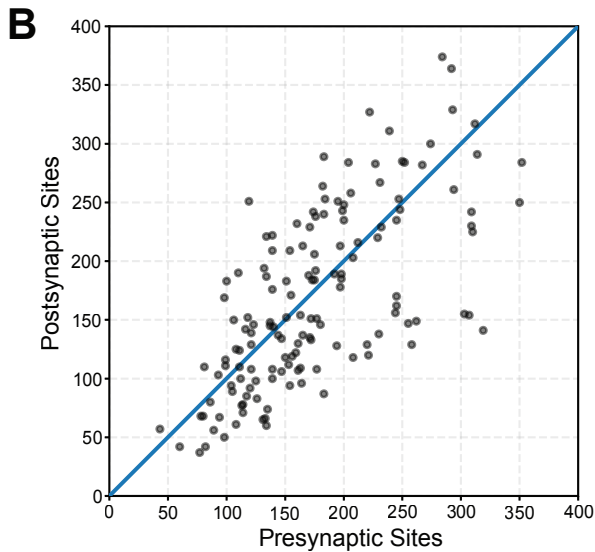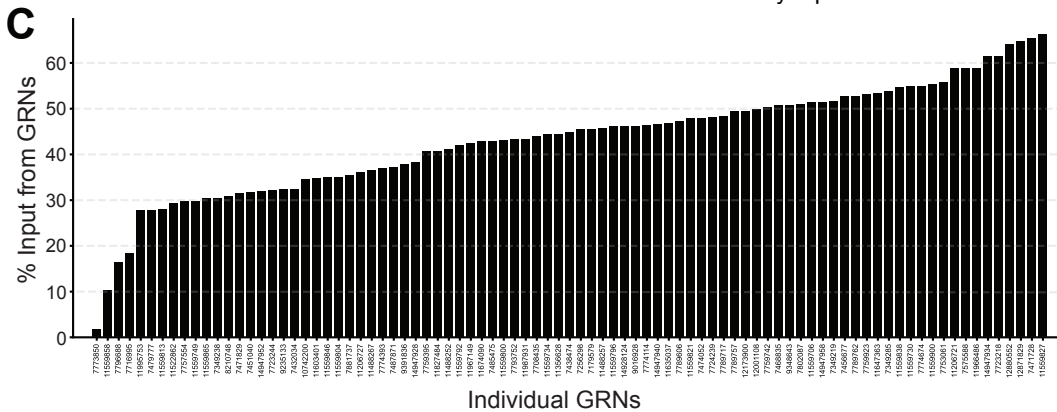

Supplement: supp [file elife-78110-supp-v1.zip]

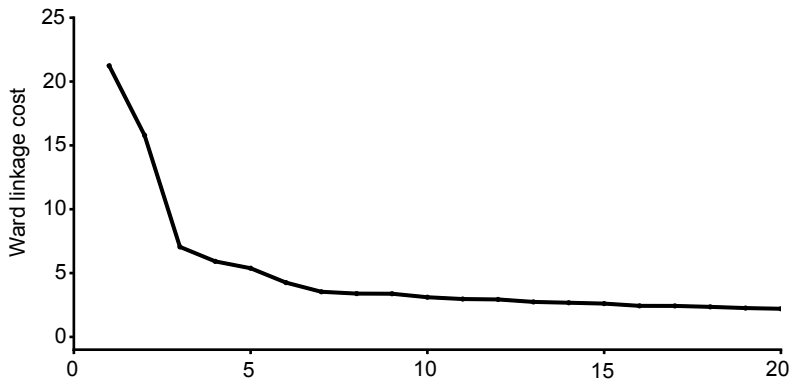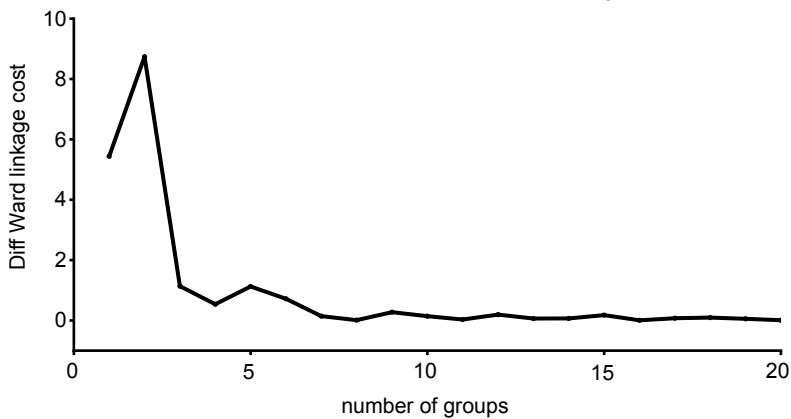

Supplement: supp [file elife-78110-supp-v1.zip]

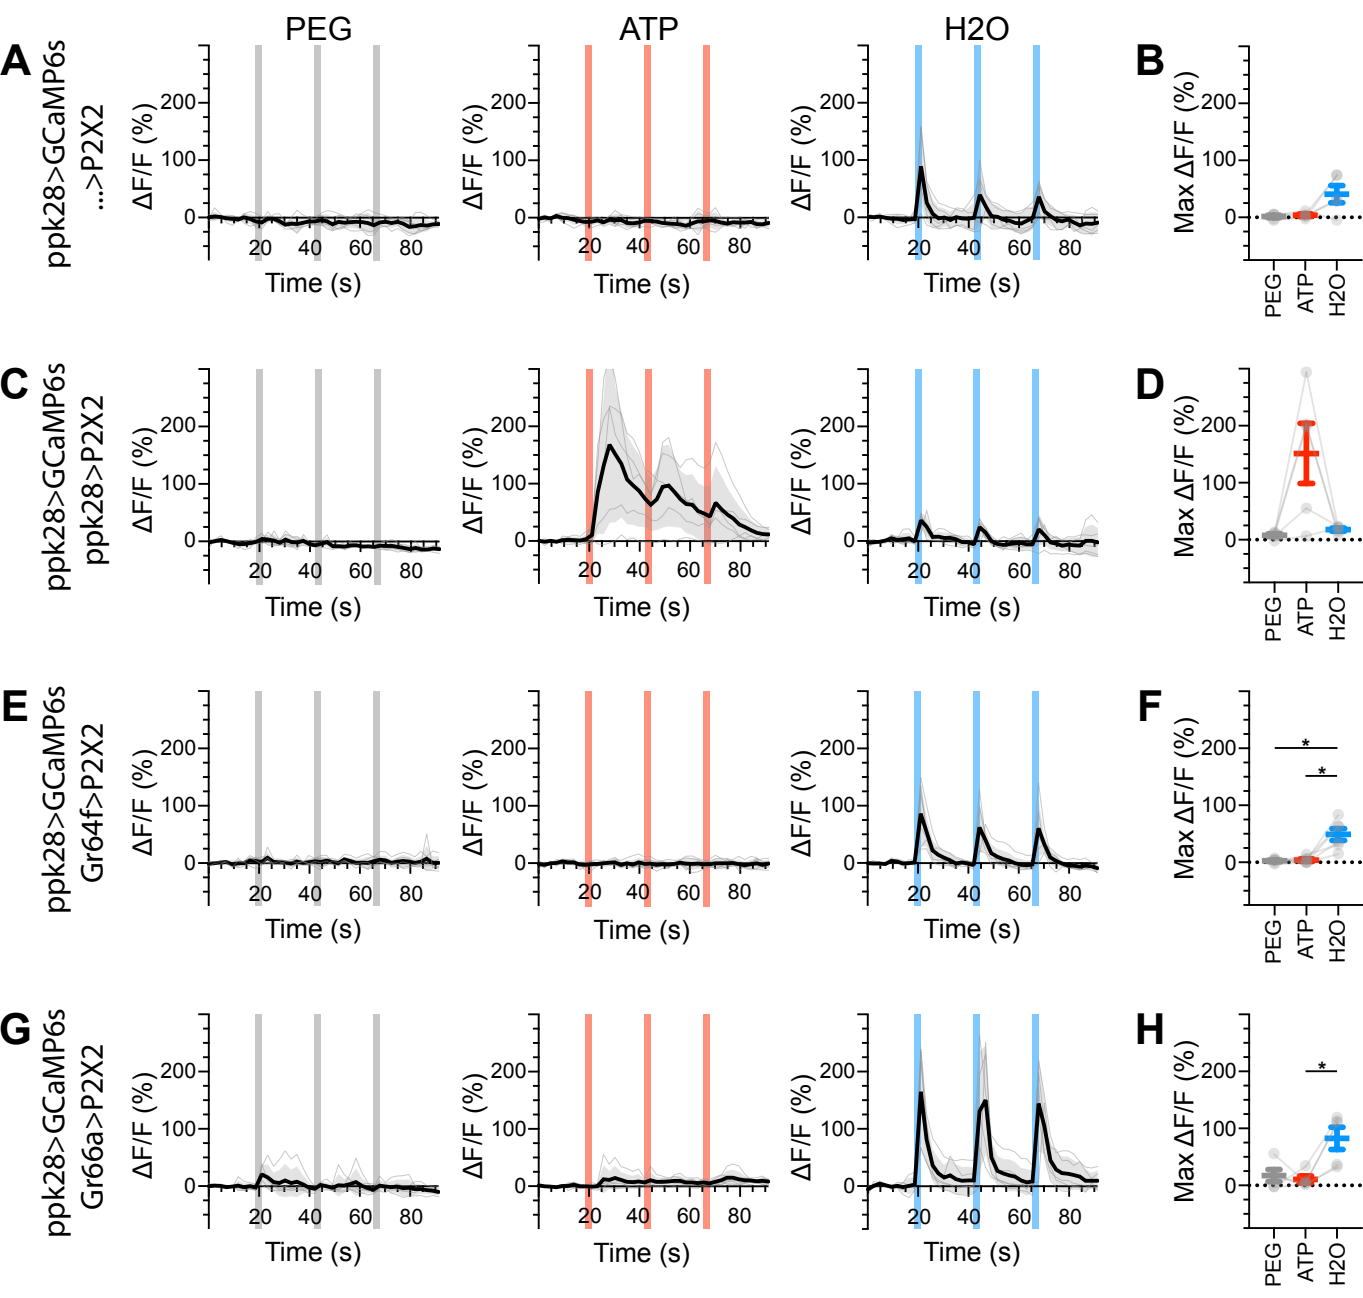

Supplement: supp [file elife-78110-supp-v1.zip]

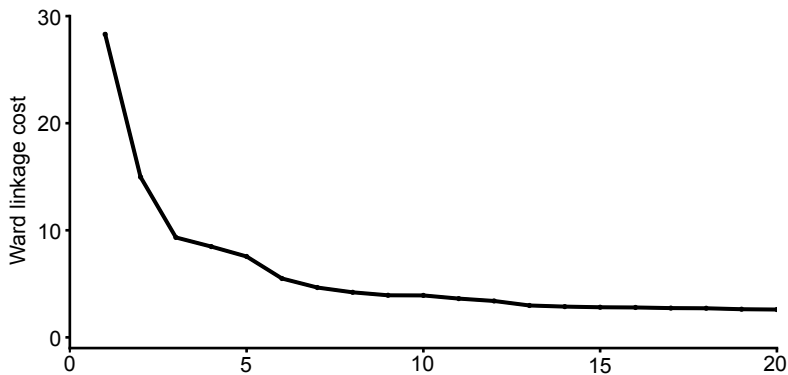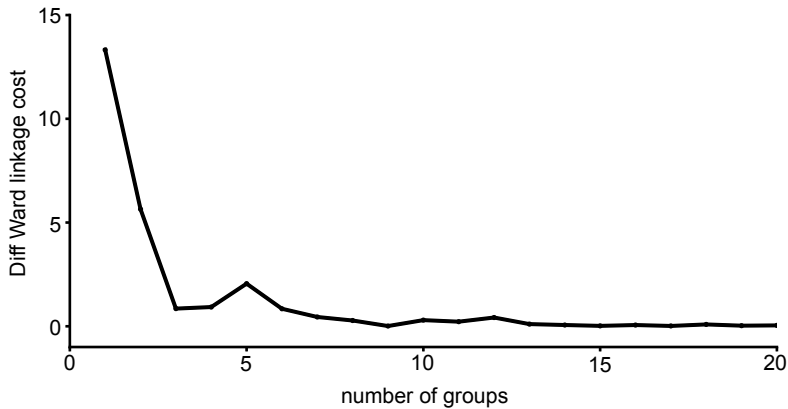

Supplement: supp [file elife-78110-supp-v1.zip]

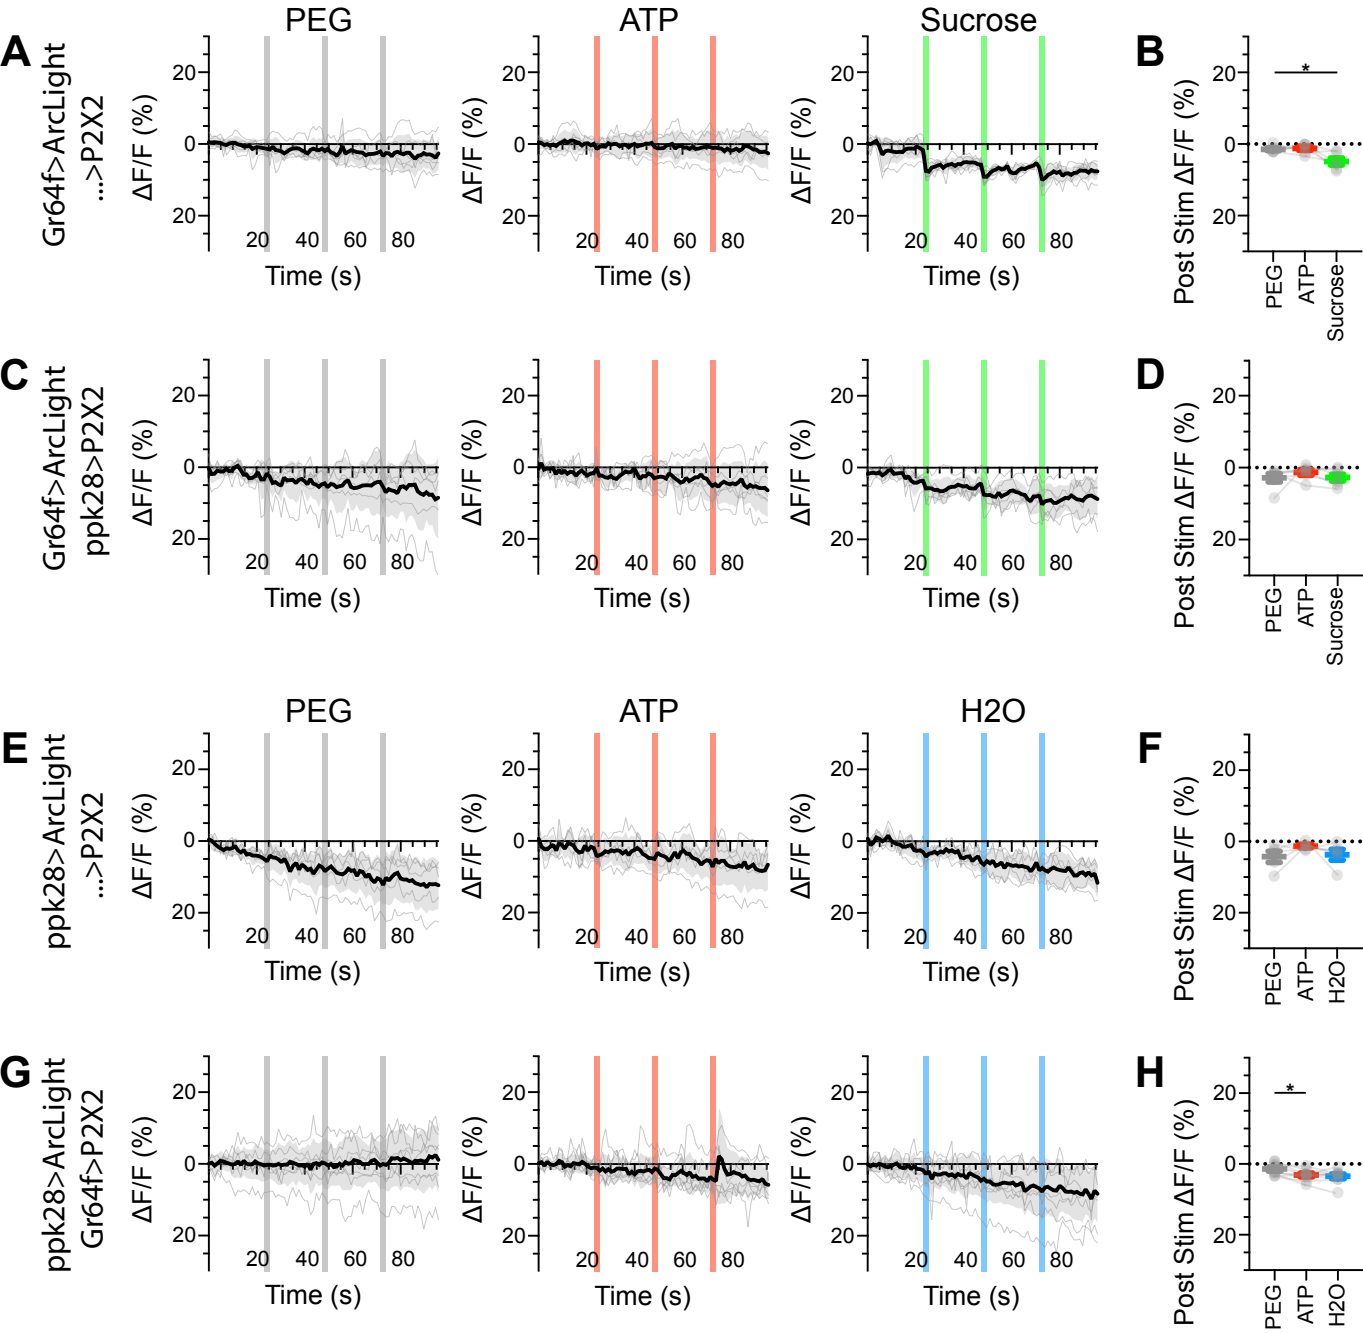

Supplement: supp [file elife-78110-supp-v1.zip]

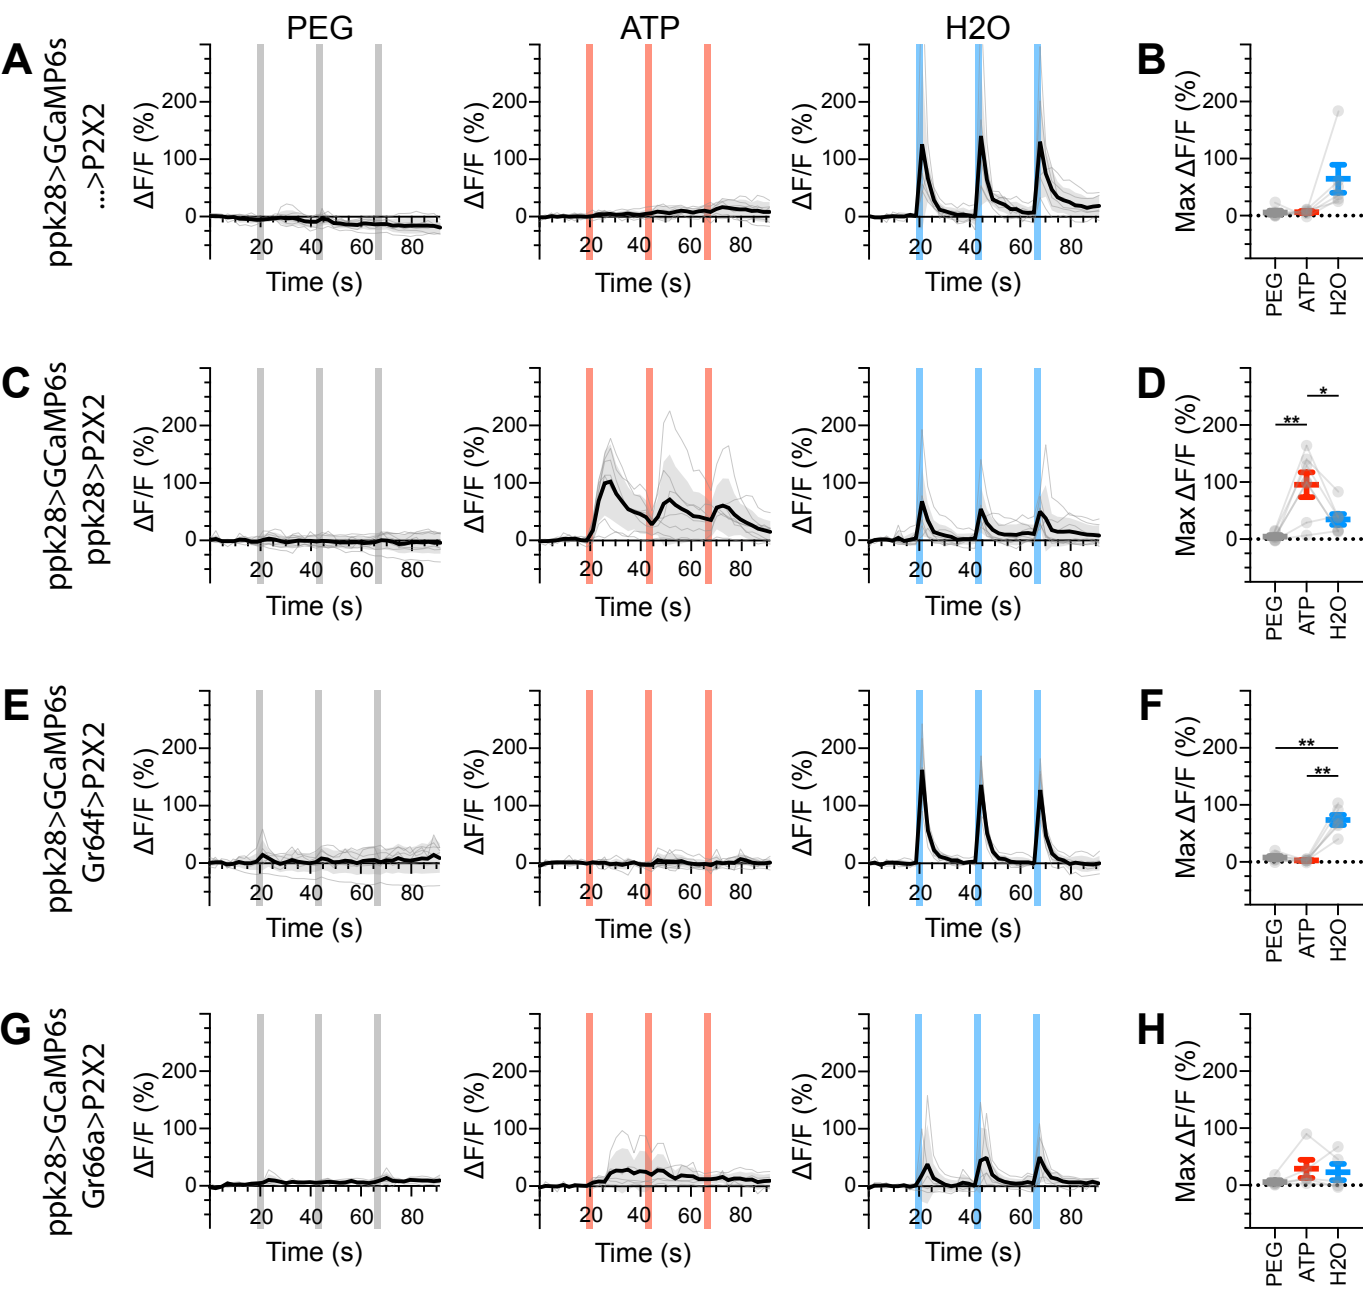

Supplement: supp [file elife-78110-supp-v1.zip]

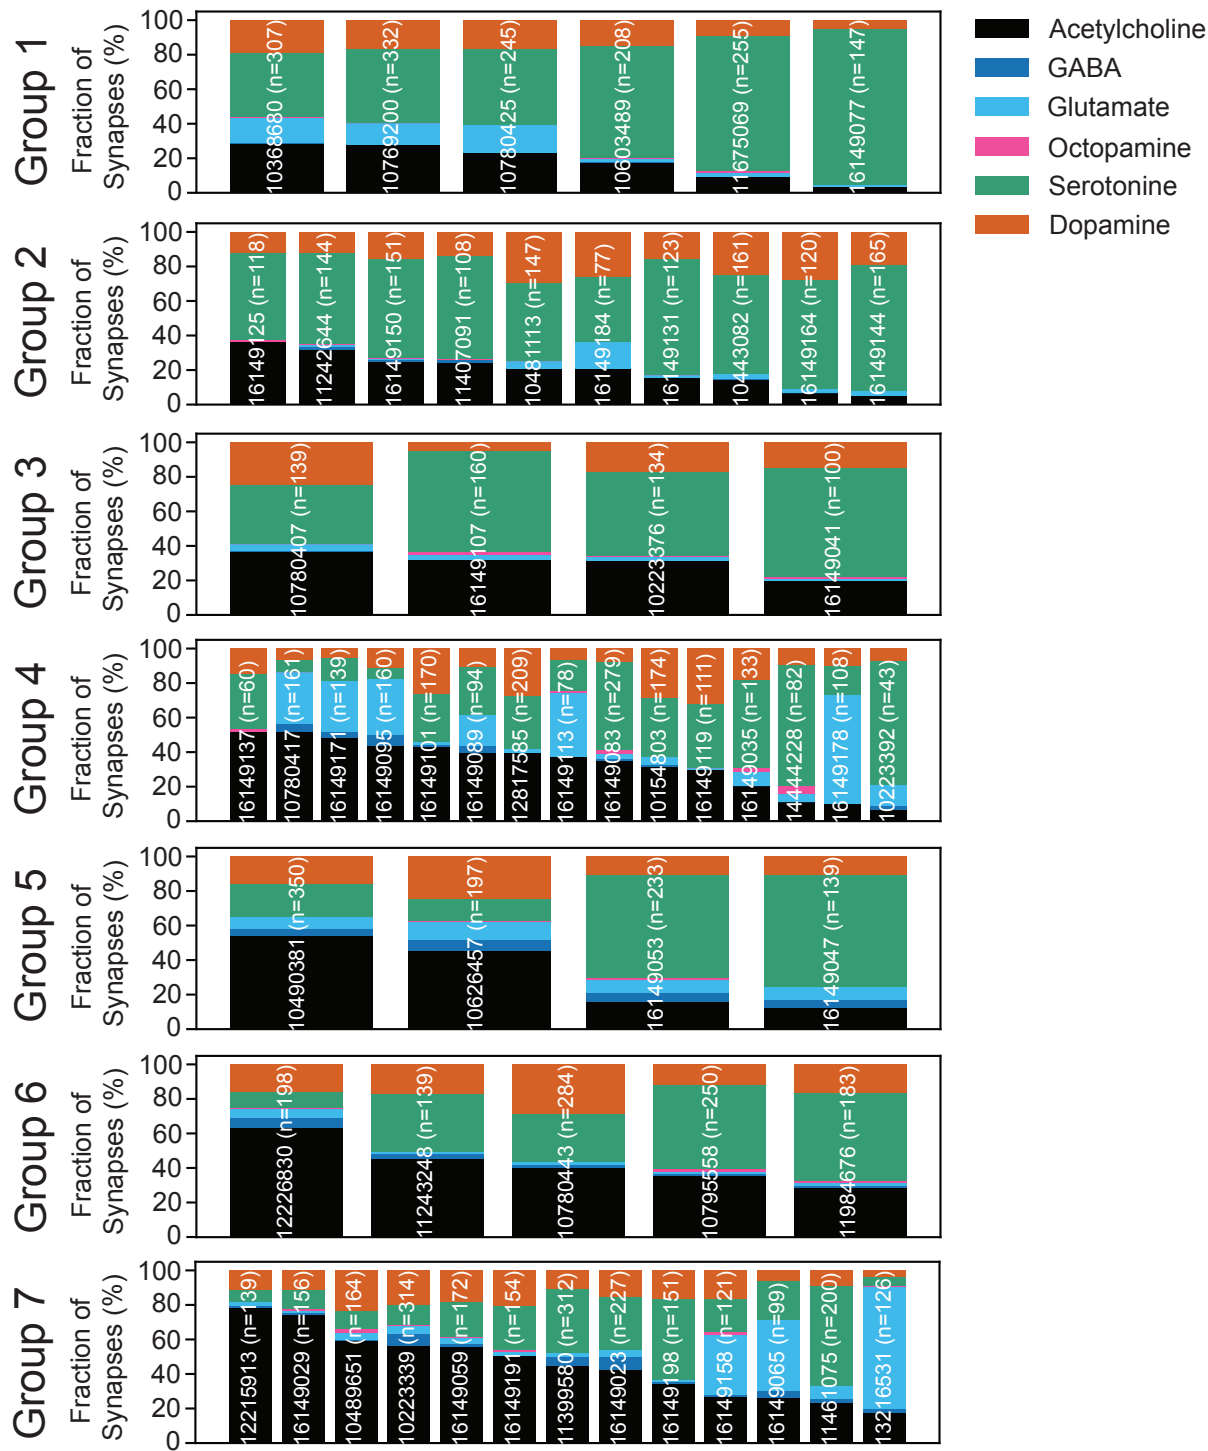

Supplement: supp [file elife-78110-supp-v1.zip]

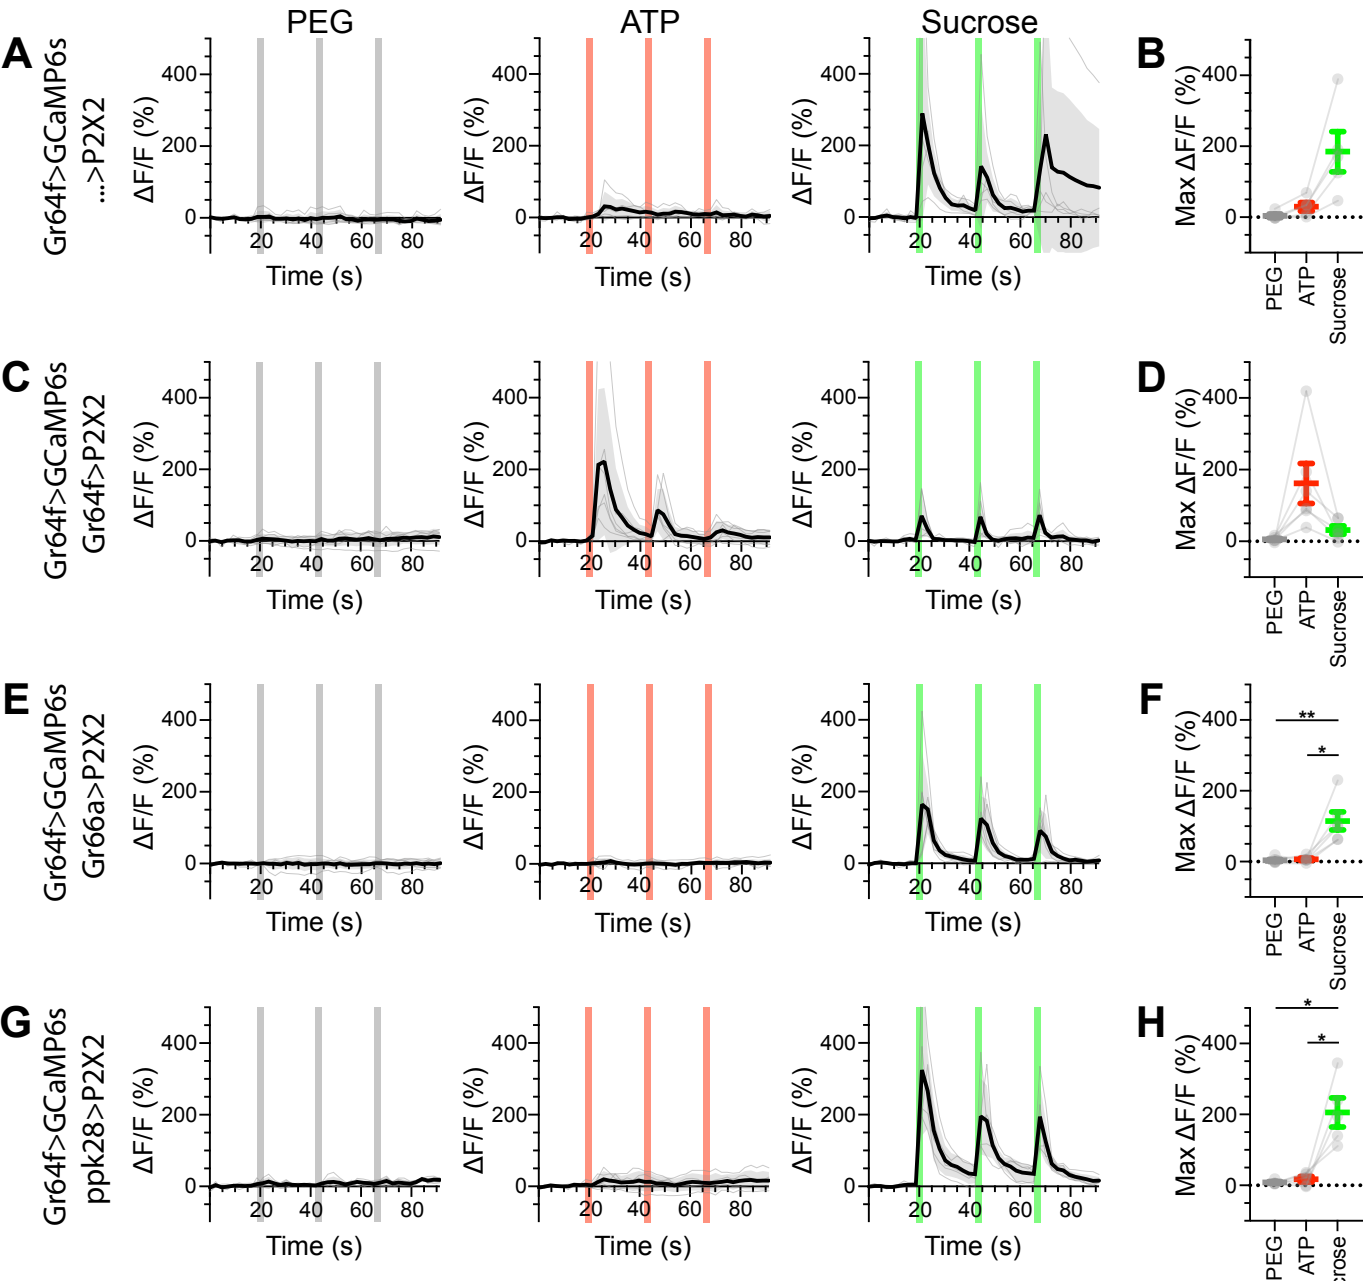

Supplement: supp [file elife-78110-supp-v1.zip]

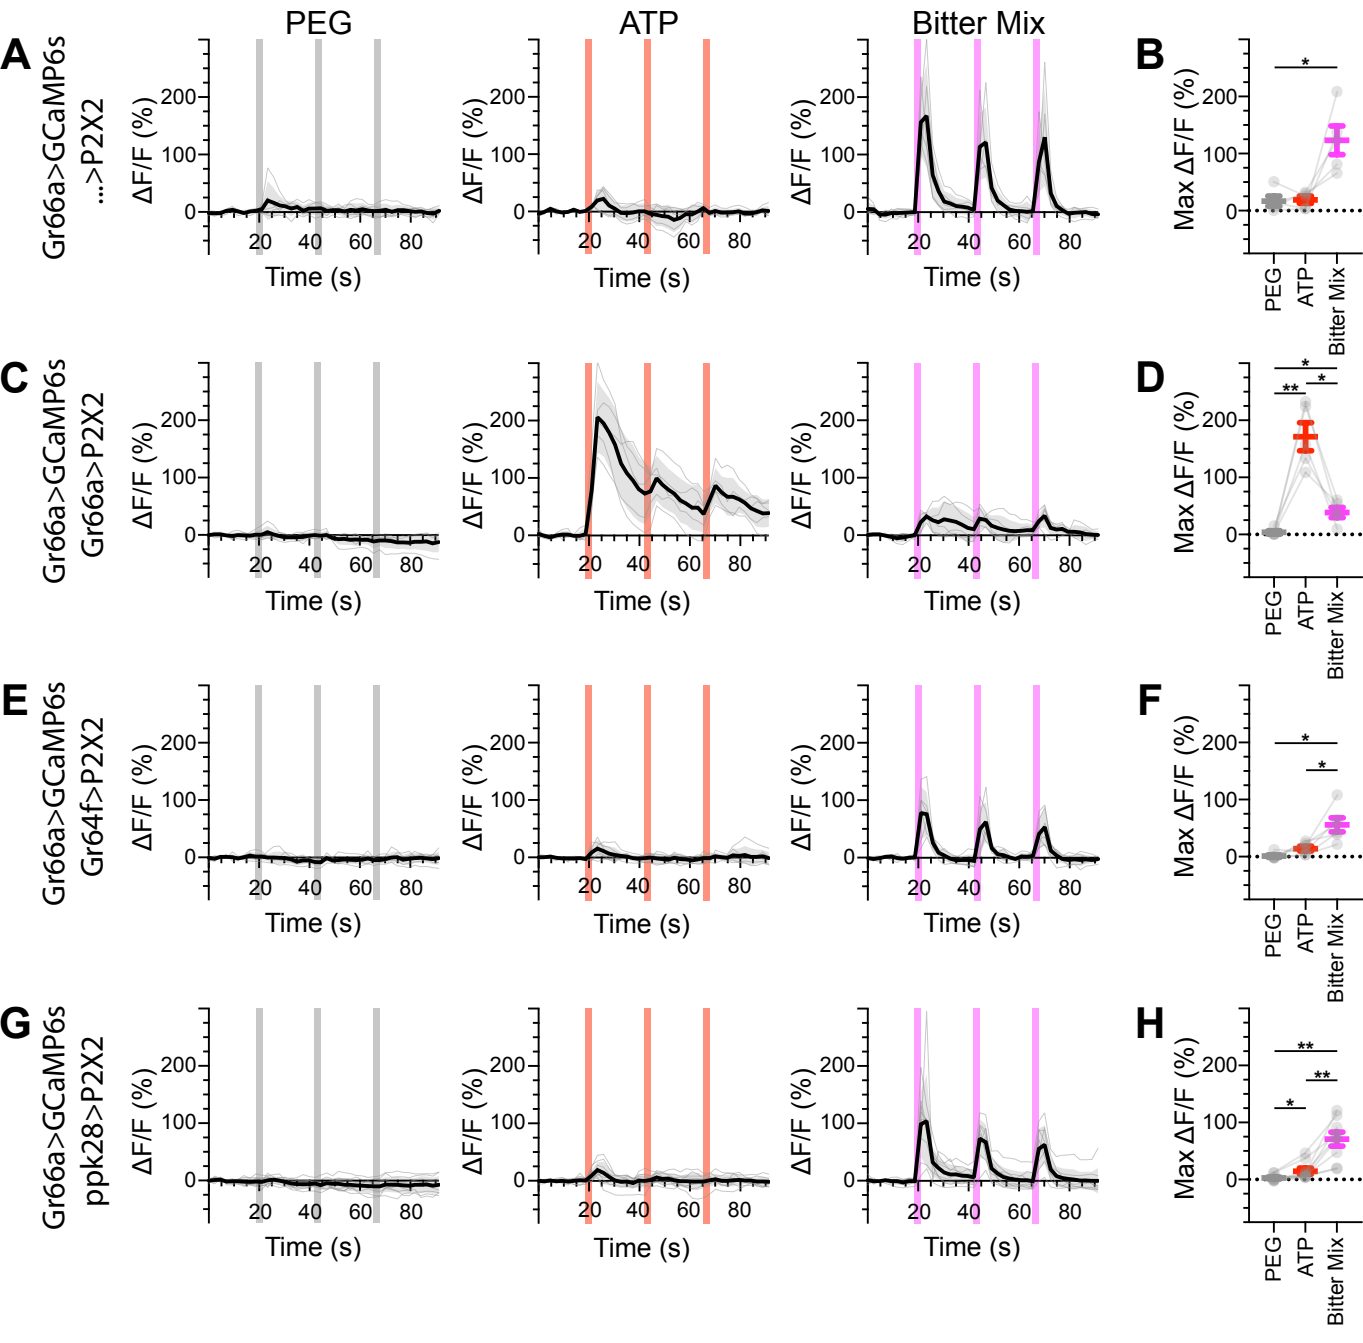

Supplement: supp [file elife-78110-supp-v1.zip]

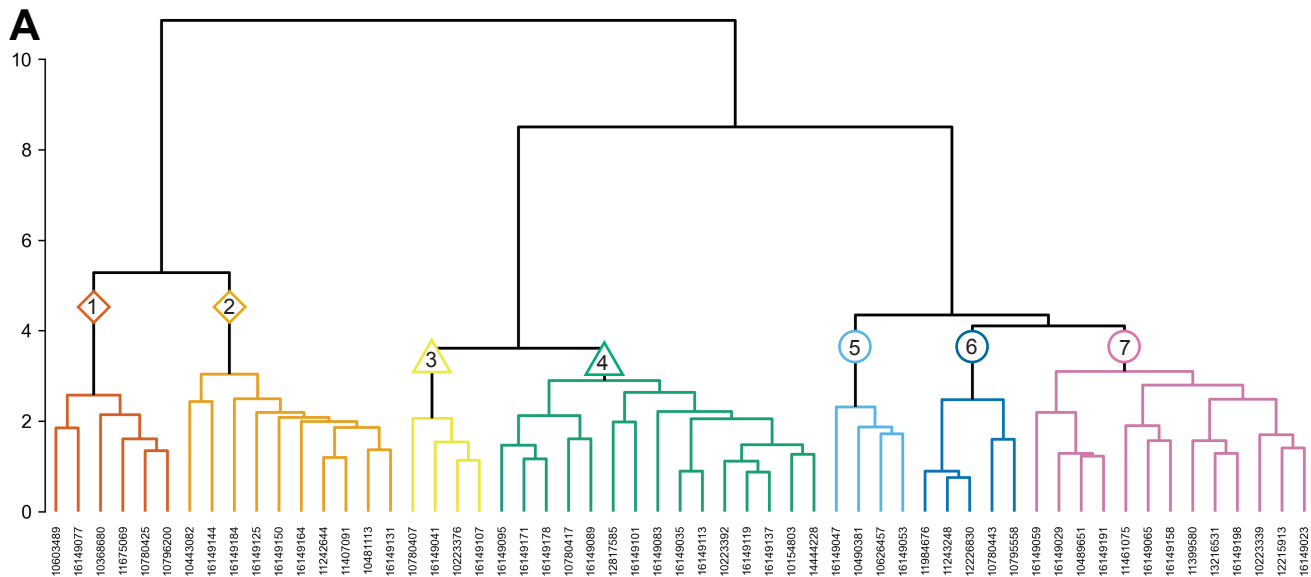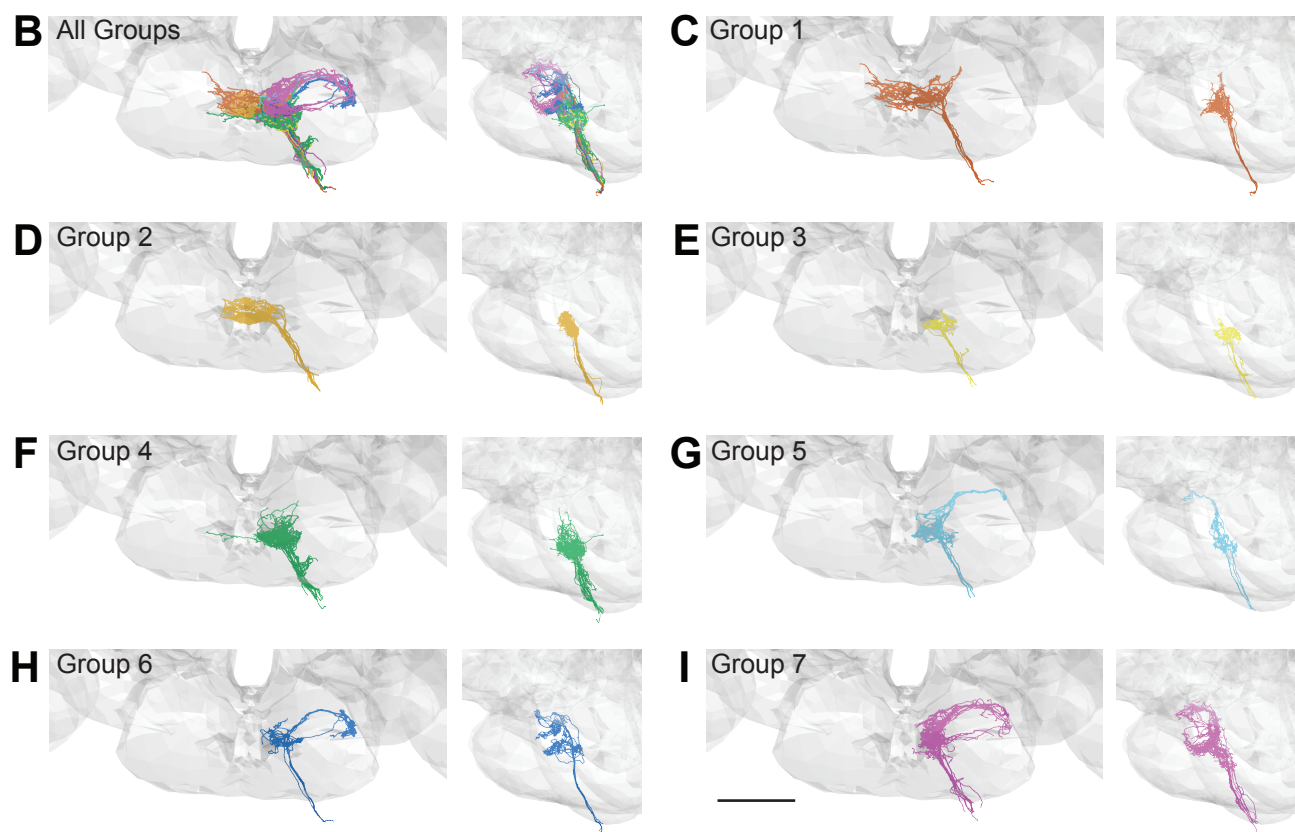

Supplement: supp [file elife-78110-supp-v1.zip]

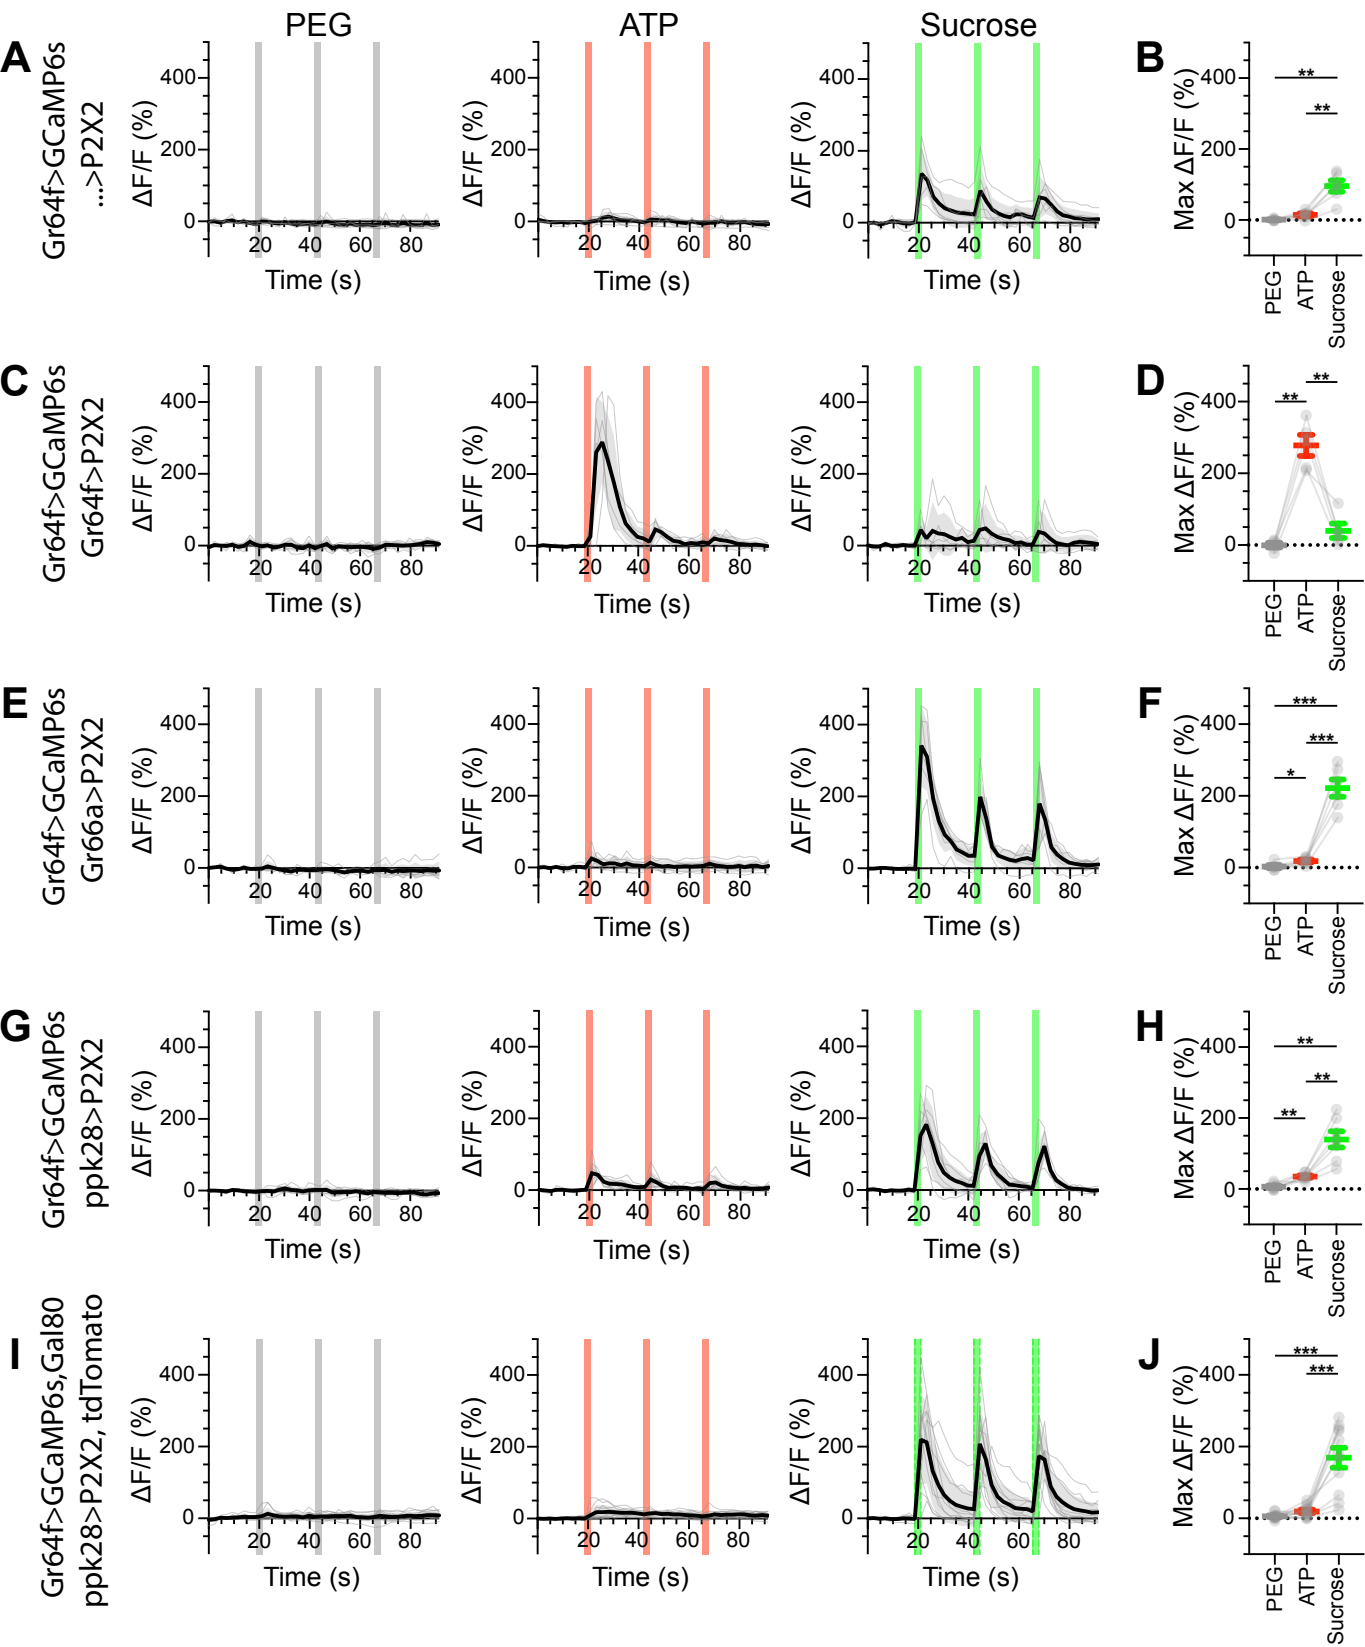

Supplement: supp [file elife-78110-supp-v1.zip]

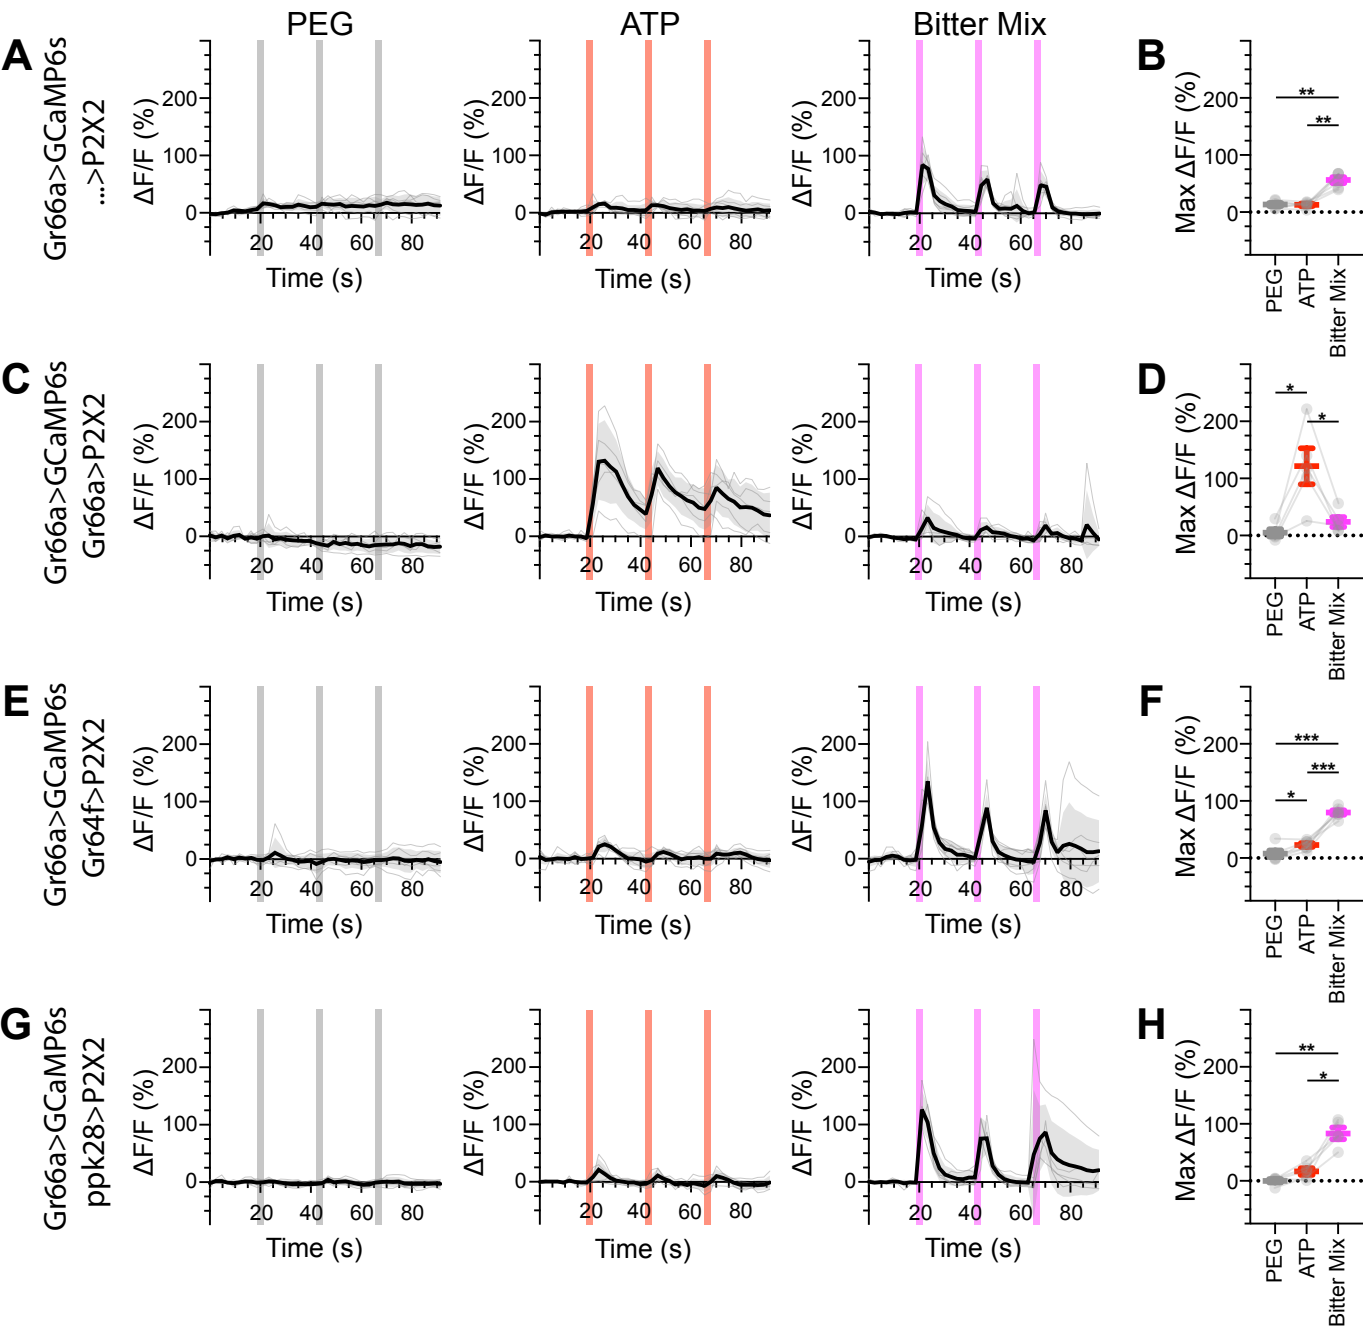

Supplement: supp [file elife-78110-supp-v1.zip]
